# Supplementary material for: Serological Biomarkers of Extracellular Matrix Turnover and Neutrophil Activity Are Associated with Long-Term Use of Vedolizumab in Patients with Crohn’s Disease
Source: MDPI journal article supplement (doi:10.3390/ijms23158137), 2022-07-23
Supplement: s1 [file s1]

**Table S1.** Spearman rank correlation coefficients, determining the association between baseline biomarker levels and disease activity. Data is presented as  $\rho$  (p-value).

| Biomarker                | HBI <sup>a</sup>    | SES-CD <sup>b</sup> | Active disease at baseline |
|--------------------------|---------------------|---------------------|----------------------------|
| <i>C1M</i>               | 0.12 (0.545)        | 0.30 (0.205)        | -0.09 (0.638)              |
| <b><i>C3M</i></b>        | 0.08 (0.690)        | <b>0.38 (0.097)</b> | -0.02 (0.914)              |
| <b><i>PRO-C3</i></b>     | -0.14 (0.493)       | -0.27 (0.255)       | <b>-0.34 (0.081)</b>       |
| <b><i>C3M/PRO-C3</i></b> | 0.13 (0.508)        | 0.40 (0.080)        | <b>0.34 (0.081)</b>        |
| <i>C4M</i>               | 0.11 (0.570)        | 0.30 (0.198)        | -0.06 (0.745)              |
| <b><i>C4G</i></b>        | <b>0.35 (0.066)</b> | -0.13 (0.586)       | 0.12 (0.538)               |
| <i>PRO-C4</i>            | 0.01 (0.974)        | 0.21 (0.366)        | 0.05 (0.800)               |
| <i>C4M/C4G</i>           | -0.24 (0.224)       | 0.21 (0.373)        | -0.18 (0.363)              |
| <i>PRO-C4/C4M</i>        | -0.12 (0.537)       | -0.24 (0.308)       | 0.26 (0.174)               |
| <i>PRO-C4/C4G</i>        | -0.32 (0.103)       | 0.20 (0.405)        | -0.14 (0.491)              |
| <i>C6Ma3</i>             | -0.26 (0.185)       | 0.05 (0.836)        | -0.28 (0.151)              |
| <i>CPa9-HNE</i>          | -0.12 (0.544)       | 0.09 (0.701)        | -0.05 (0.800)              |
| <i>CPa9-HNE/C4G</i>      | -0.30 (0.120)       | 0.07 (0.777)        | -0.11 (0.587)              |

<sup>a</sup>HBI scores available for 28 patients out of 32 (88%).

<sup>b</sup>SES-CD scores available for 20 patients out of 32 (63%).
