# Supplementary material for: Serological Biomarkers of Extracellular Matrix Turnover and Neutrophil Activity Are Associated with Long-Term Use of Vedolizumab in Patients with Crohn’s Disease
Source: MDPI journal article supplement (doi:10.3390/ijms23158137), 2022-07-23
Supplement: s1 [file s1]

**Table S2.** Biomarker levels between groups stratified according to whether patients experienced either primary response, secondary response, or no response.

| Biomarker               | Primary responders<br>(PR)<br>n = 10 | Secondary responders<br>(SR)<br>n = 7 | Non-responders<br>(NR)<br>n = 15 | p-value<br>(PR vs. SR) | p-value<br>(PR vs. NR) | p-value<br>(SR vs. NR) |
|-------------------------|--------------------------------------|---------------------------------------|----------------------------------|------------------------|------------------------|------------------------|
| <b>Baseline</b>         |                                      |                                       |                                  |                        |                        |                        |
| <b>C1M (ng/ml)</b>      | <b>33.7 [26.46–49.21]</b>            | <b>38.3 [25.38–58.60]</b>             | <b>108.6 [57.47–148.45]</b>      | 0.902                  | <b>0.008</b>           | <b>0.022</b>           |
| <b>C3M (ng/ml)</b>      | 10.7 [10.02–14.68]                   | <b>8.9 [7.21–11.20]</b>               | <b>15.2 [13.07–16.44]</b>        | 0.189                  | 0.189                  | <b>0.006</b>           |
| <i>PRO-C3 (ng/ml)</i>   | 7.4 [6.19–8.95]                      | 4.9 [4.06–6.74]                       | 5.7 [5.34. 6.49]                 | 0.308                  | 0.420                  | 0.523                  |
| <i>C3M/PRO-C3</i>       | 1.6 [1.42–1.79]                      | 1.6 [1.45–1.84]                       | 2.6 [1.98. 3.13]                 | 0.774                  | 0.075*                 | 0.075*                 |
| <b>C4M (ng/ml)</b>      | 24.9 [23.42–36.52]                   | <b>22.5 [21.08–28.03]</b>             | <b>36.5 [28.24–46.68]</b>        | 0.518                  | 0.109                  | <b>0.048</b>           |
| <i>C4G (ng/ml)</i>      | 24.1 [15.85–33.60]                   | 19.2 [14.46–21.51]                    | 18.0 [13.56–26.74]               | 0.688                  | 0.688                  | 0.758                  |
| <i>PRO-C4 (ng/ml)</i>   | 182.2 [175.40–198.77]                | 182.0 [124.20–212.16]                 | 266.8 [207.20–308.26]            | 0.663                  | 0.085*                 | 0.068*                 |
| <b>C4M/C4G</b>          | <b>0.9 [0.82–1.68]</b>               | 1.6 [1.12–1.87]                       | <b>2.0 [1.40–2.44]</b>           | 0.483                  | <b>0.037</b>           | 0.483                  |
| <i>PRO-C4/C4M</i>       | 7.4 [6.35–7.98]                      | 6.6 [6.30–7.57]                       | 6.9 [6.51–7.75]                  | 1.000                  | 1.000                  | 1.000                  |
| <i>PRO-C4/C4G</i>       | 7.1 [5.86–11.45]                     | 10.1 [7.22–13.78]                     | 14.5 [9.66–17.12]                | 0.572                  | 0.099*                 | 0.392                  |
| <i>C6Ma3 (ng/ml)</i>    | 0.7 [0.56–0.81]                      | 0.6 [0.48–0.74]                       | 0.8 [0.68–1.02]                  | 0.602                  | 0.127                  | 0.080*                 |
| <b>CPa9-HNE (ng/ml)</b> | <b>235.5 [202.61–287.24]</b>         | <b>227.8 [181.74–280.28]</b>          | <b>401.2 [281.36–452.00]</b>     | 0.885                  | <b>0.034</b>           | <b>0.034</b>           |
| <i>CPa9-HNE/C4G</i>     | 12.9 [4.73–16.39]                    | 11.6 [9.64–16.28]                     | 18.5 [11.14–29.28]               | 0.686                  | 0.177                  | 0.424                  |

Significances are post-hoc Holm corrected for multiple comparisons.

\*p-values significant before multiple comparison.
