# Supplementary material for: Serological Biomarkers of Extracellular Matrix Turnover and Neutrophil Activity Are Associated with Long-Term Use of Vedolizumab in Patients with Crohn’s Disease
Source: MDPI journal article supplement (doi:10.3390/ijms23158137), 2022-07-23
Supplement: s1 [file s1]

**Table S3.** Tertile levels for each biomarker. Percentage of long-term users are shown within square brackets for each tertile, along with the corresponding proportions of primary and secondary responders.

| <b>Biomarker</b>              | <b>Tertile 1 (ng/ml)</b><br>[%total LTU (%PR/%SR)] | <b>Tertile 2 (ng/ml)</b><br>[%total LTU (%PR/%SR)] | <b>Tertile 3 (ng/ml)</b><br>[%total LTU (%PR/%SR)] | <b>P-value</b> |
|-------------------------------|----------------------------------------------------|----------------------------------------------------|----------------------------------------------------|----------------|
| <b>C1M</b>                    | <b>11.8 - 38.3</b><br><b>[91 (55/36)]</b>          | <b>41.1–107.8</b><br><b>[45 (27/18)]</b>           | <b>108.6–244.4</b><br><b>[20 (10/10)]</b>          | <b>0.004</b>   |
| <b>C3M</b>                    | <b>6.9–10.5</b><br><b>[82 (45/36)]</b>             | <b>10.6–15.2</b><br><b>[45 (18/27)]</b>            | <b>15.3–26.5</b><br><b>[30 (30/0)]</b>             | <b>0.049</b>   |
| PRO-C3                        | 2.9–5.4<br>[55 (18/36)]                            | 5.4–7.2<br>[36 (27/9)]                             | 7.5–16.4<br>[70 (50/20)]                           | 0.302          |
| <b>C3M/PRO-C3<sup>a</sup></b> | <b>0.7–1.6</b><br><b>[82 (45/36)]</b>              | <b>1.6–2.6</b><br><b>[45 (27/18)]</b>              | <b>2.7 – 5.0</b><br><b>[30 (20/10)]</b>            | <b>0.049</b>   |
| C4M                           | 16.3–24.5<br>[82 (45/36)]                          | 25.2–36.7<br>[36 (18/18)]                          | 39.2–75.7<br>[40 (30/10)]                          | 0.062          |
| C4G                           | 10.0–15.5<br>[55 (27/27)]                          | 15.8–25.6<br>[45 (18/27)]                          | 25.9–79.3<br>[60 (50/10)]                          | 0.795          |
| <b>PRO-C4</b>                 | <b>115.6–181.5</b><br><b>[73 (45/27)]</b>          | <b>182.0–260.4</b><br><b>[64 (36/27)]</b>          | <b>266.8 – 522.0</b><br><b>[20 (10/10)]</b>        | <b>0.037</b>   |
| <b>C4M/C4G<sup>a</sup></b>    | <b>0.5–1.3</b><br><b>[73 (55/18)]</b>              | <b>1.4–2.0</b><br><b>[64 (27/36)]</b>              | <b>2.0–4.8</b><br><b>[20 (10/10)]</b>              | <b>0.037</b>   |
| PRO-C4/C4M <sup>a</sup>       | 4.1–6.6<br>[55% (27/27)]                           | 6.7–7.7<br>[45 (27/18)]                            | 7.7–12.9<br>[60 (40/20)]                           | 0.795          |
| PRO-C4/C4G <sup>a</sup>       | 2.6–7.6<br>[73 (55/18)]                            | 8.4–14.5<br>[55 (27/27)]                           | 14.9–37.0<br>[30 (10/20)]                          | 0.146          |
| C6Ma3                         | 0.4–0.6<br>[82 (36/45)]                            | 0.6–0.8<br>[36 (36/0)]                             | 0.9–1.5<br>[40 (20/20)]                            | 0.062          |
| <b>CPa9-HNE</b>               | <b>121.5–231.7</b><br><b>[82 (45/36)]</b>          | <b>235.6–362.3</b><br><b>[55 (36/18)]</b>          | <b>369.5–557.2</b><br><b>[20 (10/10)]</b>          | <b>0.018</b>   |
| CPa9-HNE/C4G <sup>a</sup>     | 2.8–10.9<br>[64 (36/27)]                           | 11.6–18.5<br>[64 (36/27)]                          | 18.9–46.1<br>[30 (20/10)]                          | 0.210          |

Abbreviations: LTU, long-term users; PR, primary responders; SR, secondary responders.

<sup>a</sup>Biomarker ratios with no concentration unit.
